# Supplementary material for: Evaluation and comparison of UV/H2O2 and adsorption on active carbon as a tertiary wastewater treatment for pharmaceutical removal within a small WWTP: a pilot study
Source: Royal Society of Chemistry journal article supplement (doi:10.1039/d3ew00258f), 2023-10-13
Supplement: d3ew00258f1.pdf [file d3ew00258f1.pdf]

## Supplementary information

Supplementary Table 1: The complete initial monitoring of 17 other pharmaceuticals

| ng/L               | Inflow | n = 3   | Outflow | n = 3   | Point A | n = 3   | Point B | n = 3   | Point C | n = 3   | JHB_32 | n = 3   | JHB_33 | n = 3   | JHB_35 | n = 3   | JHB_37 | n = 3   | Pond 1 | n = 3   |
|--------------------|--------|---------|---------|---------|---------|---------|---------|---------|---------|---------|--------|---------|--------|---------|--------|---------|--------|---------|--------|---------|
|                    | Avg.   | RSD [%] | Avg.    | RSD [%] | Avg.    | RSD [%] | Avg.    | RSD [%] | Avg.    | RSD [%] | Avg.   | RSD [%] | Avg.   | RSD [%] | Avg.   | RSD [%] | Avg.   | RSD [%] | Avg.   | RSD [%] |
| tramadol           | 2102   | 7,4     | 2234    | 3,3     | 2064    | 6,5     | 2197    | 6,3     | 1994    | 6,6     | nd     |         | nd     |         | 165    | 11,3    | 114    | 2,6     | 503    | 3,3     |
| karbamazepin       | 2453   | 2,8     | 2526    | 5,7     | 2782    | 4,4     | 2323    | 4,4     | 2396    | 8,1     | 4050   | 6,7     | 4080   |         | 4175   | 9,7     | 4405   | 0,8     | 4470   | 2,7     |
| sulfamethoxazol    | 111    | 1,4     | 819     | 6,6     | 682     | 7,4     | 545     | 11,3    | 665     | 8,2     | 33     | 12,5    | 31     | 13,1    | 79     | 4,4     | 317    | 1,0     | 1511   | 8,5     |
| hydrochlorothiazid | 3135   | 7,9     | 2837    | 8,9     | 2836    | 1,4     | 2630    | 5,7     | 2574    | 2,2     | 137    | 2,4     | 38     | 5,4     | 102    | 2,5     | 159    | 2,4     | 399    | 3,4     |
| diklofenak         | 2233   | 7,7     | 1368    | 6,2     | 1278    | 3,9     | 1141    | 6,0     | 1103    | 1,4     | nd     |         | nd     |         | nd     |         | nd     |         | 238    | 4,3     |
| metoprolol         | 2625   | 7,3     | 851     | 3,1     | 821     | 11,4    | 608     | 17,0    | 530     | 19,3    | nd     |         | nd     |         | nd     |         | 14     | 13,7    | 34     | 0,3     |
| gabapentin         | 21566  | 2,2     | nd      |         | nd      |         | nd      |         | nd      |         | nd     |         | nd     |         | nd     |         | nd     |         | 10     | 11,2    |
| sulfapyridin       | 352    | 2,4     | 270     | 13,3    | 252     | 6,3     | 223     | 1,2     | 228     | 1,9     | nd     |         | nd     |         | nd     |         | 66     | 13,8    |        |         |
| kofein             | 40440  | 1,5     | 46      | 4,9     | 60      | 11,4    | 67      | 10,1    | 61      | 9,6     | 22,0   | 2,0     | 55,6   | 3,1     | nd     |         | 28     | 5,3     | 209    | 3,3     |
| sulfamethazin      | nd     |         | nd      |         | nd      |         | nd      |         | nd      |         | nd     |         | nd     |         | nd     |         | nd     |         | nd     |         |
| naproxen           | 4939   | 4,0     | nd      |         | nd      |         | nd      |         | nd      |         | nd     |         | nd     |         | nd     |         | nd     |         | 62     | 1,5     |
| sulfanilamid       | 1900   | 8,4     | nd      |         | nd      |         | nd      |         | nd      |         | nd     |         | nd     |         | nd     |         | nd     |         | nd     |         |
| atenolol           | 2437   | 11      | 33      | 0,6     | 15      | 4,1     | 10      | 6,6     | 9       | 7,4     | nd     |         |
| ketoprofen         | 540    | 4,4     | 37      | 2,7     | 40      | 5,6     | 28      | 1,0     | 18      | 8,2     | nd     |         |
| ibuprofen          | 26263  | 0,6     | 334     | 4,5     | 344     | 0,6     | 335     | 4,2     | 357     | 2,8     | nd     |         |
| paracetamol        | 5108   | 5,4     | nd      |         | nd      |         | nd      |         | nd      |         | nd     |         | nd     |         | nd     |         | nd     |         | 62     | 12,7    |
| sacharin           | 84600  | 6,2     | nd      |         | nd      |         | nd      |         | nd      |         | nd     |         | nd     |         | nd     |         | nd     |         | nd     |         |

| ng/g = ppb         | Activated sludge | n = 3   |
|--------------------|------------------|---------|
|                    | Avg              | RSD [%] |
| tramadol           | 122,8            | 8,9     |
| karbamazepin       | 135,1            | 4,7     |
| sulfamethoxazol    | 30,9             | 7,6     |
| hydrochlorothiazid | 121,5            | 4,6     |
| diklofenak         | 77,2             | 2,2     |
| metoprolol         | 47,4             | 14,9    |
| gabapentin         | 94,4             | 4,2     |
| sulfapyridin       | 23,7             | 1,7     |
| kofein             | 63,5             | 7,8     |
| sulfamethazin      | 1,2              | 12,8    |
| naproxen           | nd               |         |
| sulfanilamid       | nd               |         |
| atenolol           | nd               |         |
| ketoprofen         | nd               |         |
| ibuprofen          | 49,3             | 7,9     |
| paracetamol        | 2,7              | 18,0    |
| sacharin           | nd               |         |
